# Supplementary material
Source: HighWire-hosted journal article supplement (https://www.cmajopen.ca/content/suppl/2020/12/10/8.4.E844)
Supplement: 2020-0033-reviewer-comments.pdf [file 2020-0033-reviewer-comments.pdf]

| <b>Article details: 2020-0033</b>          |                                                                                                                                                                                                                                                                                                                                                                                                                                                                                                                                                                                                                                                                                                                                                                                                                                                                                                                                                              |
|--------------------------------------------|--------------------------------------------------------------------------------------------------------------------------------------------------------------------------------------------------------------------------------------------------------------------------------------------------------------------------------------------------------------------------------------------------------------------------------------------------------------------------------------------------------------------------------------------------------------------------------------------------------------------------------------------------------------------------------------------------------------------------------------------------------------------------------------------------------------------------------------------------------------------------------------------------------------------------------------------------------------|
| Title                                      | Wait time reporting systems for elective surgery in Canada: a content analysis of provincial and territorial initiatives                                                                                                                                                                                                                                                                                                                                                                                                                                                                                                                                                                                                                                                                                                                                                                                                                                     |
| Authors                                    | Romy E. Segall BSc, Julie L. Takata MA, David R. Urbach MD MSc                                                                                                                                                                                                                                                                                                                                                                                                                                                                                                                                                                                                                                                                                                                                                                                                                                                                                               |
| <b>Reviewer 1</b>                          | Ioana Bratu                                                                                                                                                                                                                                                                                                                                                                                                                                                                                                                                                                                                                                                                                                                                                                                                                                                                                                                                                  |
| Institution                                | Pediatric General Surgery, University of Alberta, Edmonton, Alta.                                                                                                                                                                                                                                                                                                                                                                                                                                                                                                                                                                                                                                                                                                                                                                                                                                                                                            |
| General comments (author response in bold) | <p>It might be interesting to expand the conclusion and describe which European countries have nation-wide reporting systems and databases and how they are used.</p> <p><b>We have included specific examples of European countries with national reporting systems.</b> (Pg. 10)</p>                                                                                                                                                                                                                                                                                                                                                                                                                                                                                                                                                                                                                                                                       |
| <b>Reviewer 2</b>                          | Jimmy Pham                                                                                                                                                                                                                                                                                                                                                                                                                                                                                                                                                                                                                                                                                                                                                                                                                                                                                                                                                   |
| Institution                                | Internal Medicine, Olive View-University of California, Los Angeles (UCLA), Sylmar, Calif.                                                                                                                                                                                                                                                                                                                                                                                                                                                                                                                                                                                                                                                                                                                                                                                                                                                                   |
| General comments (author response in bold) | <p>References with websites should be updated (some do not have working URLs) and please put the date of access</p> <p><b>The website addresses have been updated/corrected and include the date of access.</b> (References)</p> <p>Further discussion of what this qualitative review would add/aid to further studies</p> <p><b>This has been added to the conclusion.</b> (Pg. 11)</p> <p>Are there any other similar studies that are worth mentioning?</p> <p><b>There are no similar Canadian studies that have looked at the variation in wait time reporting across the provinces. There were a few international studies that looked at the differences between developed countries which we have included in the manuscript.</b> (Pg. 9-10)</p> <p>If possible, please discuss the following: Why is this study unique? What can this study add/aid/change the current practice?</p> <p><b>This has been added to the conclusion.</b> (Pg. 11)</p> |
